# Supplementary material for: Fasciola gigantica , F. hepatica and Fasciola intermediate forms: geometric morphometrics and an artificial neural network to help morphological identification
Source: PeerJ journal article supplement (doi:10.7717/peerj.8597), 2020-02-18
Supplement: Fig_S3_ITS2.pdf [file Fig_S3_ITS2.pdf]

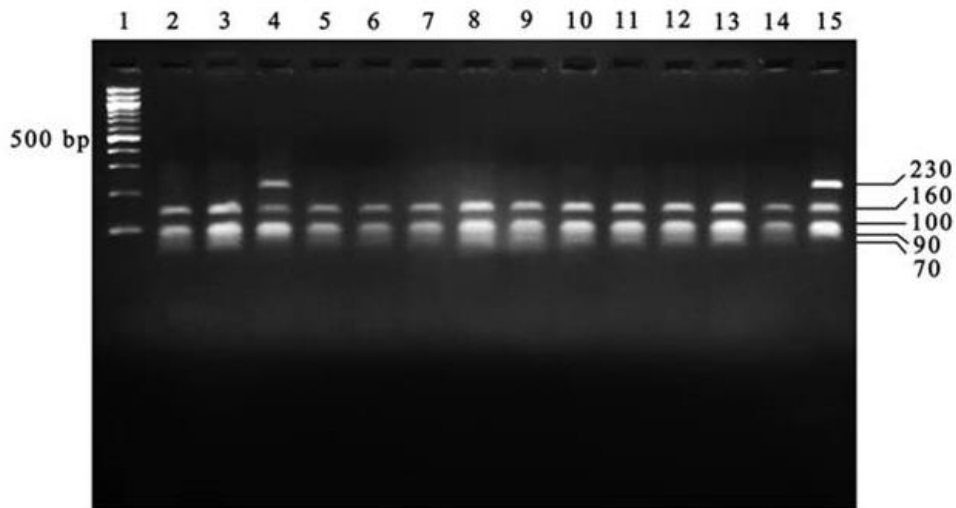

PCR-RFLP patterns of ITS2 amplicon (550 bp) digested by *Nla*III enzyme. Lane 1: 100 bp DNA ladder, lane 2 to 3: *F. gigantica*, lane 4: *Fasciola* intermediate form, lane 5 to 14: *F. gigantica*, lane 15: *Fasciola* intermediate form. The PCR digested amplicons were run on 2% agarose gel at 50 V for 180 min.
