# Supplementary material for: Fasciola gigantica, F. hepatica and Fasciola intermediate forms: geometric morphometrics and an artificial neural network to help morphological identification
Source: PeerJ. 2020 Feb 18;8:e8597. doi: 10.7717/peerj.8597 (PMC7034386; doi:10.7717/peerj.8597)
Supplement: File S1 [file peerj-08-8597-s004.xlsx]

## Sheet: traditinal morphometric data
Code	PCR-RFLP (ITS1)	Seminal vescicle	Body length, BL	Body width, BW	BW at ovary level, BWOv	Body perimeter, BP	Cone length, CL	Cone width, CW	Oral sucker maximum diameter,	Oral sucker minimum diameter,	Ventral sucker maximum diameter,	Ventral sucker minimum diameter,	Distance between anterior end of body and VS, A-VS	Distance between suckers, OS-VS	Distance between VS and union of vitelline glands, VS-Vit	Distance between Vit and posterior end of body, Vit-P	Distance between VS and posterior end of body, VS-P	Pharynx length, PhL	Pharynx width, PhW	Testicular space length, TL	Testicular space width, TW	Testicular space perimeter, TP
ONA1	Fg	1	33.71	8.864	5.081	73.552	2.424	4.099	0.91	0.357	1.313	1.364	2.378	1.835	18.959	10.334	29.771	0.725	0.43	16.037	4.53	40.636
OMH6	Fg	1	20.761	6.729	3.896	46.49	2.924	3.046	0.525	0.493	1.206	1.298	1.455	0.862	10.374	5.78	17.743	0.502	0.421	10.939	3.673	25.51
OMH13	Fg	1	25.563	7.82	4.67	57.835	2.582	3.428	0.84	0.535	1.303	1.303	1.941	1.303	10.286	11.839	22.278	0.825	0.749	9.201	4.5	26.312
OTA7	Fg	1	23.862	6.332	4.293	53.164	2.552	3.606	0.828	0.484	1.414	1.345	1.931	1.31	11.172	8.897	20.241	0.586	0.517	11.069	3.576	26.701
OTA8	Fg	1	21.785	9.541	4.428	50.201	2.414	3.606	0.721	0.409	1.13	1.059	1.899	1.443	10.481	8.023	17.172	0.625	0.553	8.969	6.085	26.827
OTA9	Fg	1	30.139	10.903	5.174	70.372	3.681	3.472	0.94	0.38	1.562	1.389	1.771	1.215	12.15	26.98	14.097	0.56	0.59	11.32	6.74	32.55
OLP9	Fg	1	30.88	10.993	5.129	71.165	2.535	3.994	0.996	0.459	1.553	1.591	2.057	1.521	12.799	14.613	27.36	0.708	0.775	10.743	7.457	32.839
OKC4	Fg	1	37.797	8.706	3.794	80.612	3.671	3.121	0.846	0.456	1.054	1.154	2.972	2.483	20.385	12.832	33.462	0.782	0.442	16.538	5.035	40.444
OKC5	Fg	1	36.042	8.542	5.868	79.886	2.778	3.958	0.927	0.451	1.444	1.559	2.412	1.822	18.09	13.924	32.118	0.649	0.491	16.736	4.896	40.898
NKC6	Fg	1	20.93	5.489	3.992	46.29	2.69	3.208	0.718	0.502	1.194	1.288	2.419	1.754	9.823	7.221	17.26	0.477	0.452	8.343	3.003	22.155
NKC7	Fg	1	36.736	6.319	4.444	77.995	3.333	2.937	0.927	0.621	1.181	1.292	2.91	2.123	20.034	11.884	31.986	0.685	0.549	17.123	3.811	42.278
NKC8	Fg	1	31.206	5.993	3.972	66.081	3.121	2.589	0.645	0.334	1.183	1.197	2.421	2.006	14.681	12.411	27.34	0.527	0.37	11.56	3.262	28.317
NKC9	Fg	1	42.12	7.64	4.804	88.208	3.283	3.007	0.692	0.347	1.314	1.522	2.688	2.058	21.813	16.25	37.846	0.733	0.416	19.147	3.083	43.074
NKC10	Fg	1	31.17	5.26	3.328	66.039	2.72	2.467	0.515	0.308	0.927	1.036	1.918	1.233	11.905	15.835	28.097	0.39	0.337	10.449	2.466	25.401
NKC11	Fg	1	25.036	5.363	4.337	54.115	3.04	2.376	0.69	0.503	1.108	1.032	2.021	1.276	10.333	11.579	21.941	0.425	0.281	9.164	2.473	22.271
NKC15	Fg	1	23.529	4.834	3.549	50.725	2.538	2.919	0.674	0.441	1.127	1.053	2.22	1.731	12.919	7.13	20.192	0.55	0.431	10.359	2.727	23.501
NKC20	Fg	1	37.213	6.899	4.46	79.228	2.753	3.436	0.848	0.666	1.325	1.395	2.55	1.751	18.641	33.38	14.321	0.557	0.559	16.829	3.24	37.956
OMH2	Fsp	0	14.119	7.114	4.455	33.701	1.791	2.498	0.621	0.463	0.846	0.508	1.755	1.124	7.713	3.855	11.632	0.404	0.367	5.655	4.449	23.228
OLP1	Fsp	0	10.941	7.231	4.68	30.786	1.476	2.152	0.556	0.427	0.842	0.973	1.558	1.205	6.897	1.316	8.761	0.196	0.232	6.882	4.123	32.665
OLP7	Fsp	1	13.986	8.748	5.479	37.694	1.525	2.503	0.497	0.284	0.976	0.957	1.065	0.567	7.271	4.415	11.987	0.461	0.214	5.975	4.983	19.578
OMH14	Fsp	1	23.173	12.799	6.778	57.524	2.139	3.348	0.658	0.562	1.111	0.924	2.275	1.638	12.128	8.092	20	0.509	0.455	11.031	8.148	32.123
OTA6	Fsp	1	17.788	11.175	4.5	46.345	1.697	2.902	0.697	0.44	0.705	0.695	1.6	1.292	11.266	3.685	15.46	0.376	0.283	9.702	7.139	28.596
New-03	Fsp	1	12.019	5.93	3.825	29.236	1.234	1.824	0.515	0.379	0.686	0.579	1.305	0.624	7.122	2.994	10.029	0.392	0.289	6.374	3.735	17.773
New-04	Fsp	1	13.402	7.134	4.808	33.45	1.387	1.802	0.521	0.358	0.776	0.826	1.384	0.863	7.33	3.828	11.157	0.38	0.245	7.254	4.204	20.064
New-05	Fsp	1	13.313	7.334	3.257	33.472	1.77	2.06	0.591	0.426	0.892	0.734	1.484	1.03	7.24	3.541	11.109	0.441	0.228	6.973	4.531	33.165
New-07	Fsp	1	11.424	7.791	5.184	30.092	1.299	1.958	0.598	0.416	0.802	0.775	1.311	0.798	6.035	3.616	9.413	0.554	0.252	5.98	4.681	18.727
New-08	Fsp	1	15.828	10.829	7.734	43.064	1.533	2.539	0.629	0.372	0.883	0.76	1.39	0.944	8.291	5.187	13.511	0.402	0.232	7.811	6.913	24.175
FH1	Fh	1	30.789	11.184	5.592	69.527	3.717	4.547	0.955	0.759	1.712	1.579	3.101	2.171	25.889	8.33	25.822	0.889	0.559	15.573	6.579	40.512
FH2	Fh	1	27.065	10.181	5.527	61.717	3.223	4.277	0.753	0.603	1.5	1.506	2.771	2.018	15.12	7.259	22.711	0.572	0.486	13.133	6.355	34.993
FH3	Fh	1	23.823	9.696	4.156	54.621	3.937	3.636	0.786	0.657	1.599	1.649	2.842	2.857	13.529	5.8	19.316	0.578	0.555	11.349	5.635	30.58
FH4	Fh	1	28.506	11.738	5.274	64.84	2.652	3.45	0.549	0.335	0.915	1.071	2.594	2.046	17.927	6.89	24.848	0.762	0.335	14.97	7.564	37.088
FH5	Fh	1	33.262	12.872	4.752	74.768	3.262	4.238	0.922	0.745	1.632	1.525	2.774	1.951	21.702	7.092	29.007	0.638	0.603	19.681	7.092	46.003
FH6	Fh	1	25.591	8.203	4.894	56.696	2.991	4.352	1.145	0.742	1.722	1.692	3.235	2.305	13.286	7.636	21.111	0.79	0.506	11.477	4.737	30.867
FH7	Fh	1	25.264	10.323	5.099	57.277	3.604	4.079	0.538	0.348	1.32	1.398	2.606	1.869	12.758	8.354	21.13	0.67	0.459	10.728	6.204	31.788
FH8	Fh	1	30.669	8.749	5.401	67.48	3.661	4.131	0.72	0.556	1.457	1.45	2.754	2.012	15.711	10.787	26.349	0.607	0.525	13.798	5.19	35.643
FH9	Fh	1	28.64	9.195	4.894	63.051	3.534	4.228	0.827	0.344	1.626	1.558	3.465	3.136	16.587	6.698	23.192	0.702	0.485	12.208	6.548	35.78
ONA1	Fg	1	3.51779	2.182	1.62551	4.29799	0.885419	1.41074	-0.0943107	-1.03002	0.272315	0.310422	0.86626	0.607044	2.94228	2.33544	3.39353	-0.321584	-0.84397	2.7749	1.51072	3.70465
OMH6	Fg	2	3.03308	1.90643	1.35995	3.83924	1.07295	1.11383	-0.644357	-0.707246	0.187309	0.260825	0.375006	-0.1485	2.3393	1.7544	2.87599	-0.689155	-0.865122	2.39233	1.30101	3.23907
OMH13	Fg	3	3.24115	2.05668	1.54116	4.05759	0.948564	1.23198	-0.174353	-0.625489	0.264669	0.264669	0.663203	0.264669	2.33078	2.4714	3.1036	-0.192372	-0.289016	2.21931	1.50408	3.27003
OTA7	Fg	4	3.17229	1.84562	1.45699	3.97338	0.936877	1.2826	-0.188742	-0.72567	0.346423	0.296394	0.658038	0.270027	2.41341	2.18571	3.00771	-0.534435	-0.659712	2.40415	1.27424	3.2847
OTA8	Fg	5	3.08122	2.2556	1.48795	3.91603	0.881285	1.2826	-0.327116	-0.89404	0.122218	0.0573251	0.641327	0.366724	2.34956	2.08231	2.84328	-0.470004	-0.592397	2.19377	1.80583	3.28941
OTA9	Fg	6	3.40582	2.38904	1.64365	4.2538	1.30318	1.24473	-0.0618754	-0.967584	0.445967	0.328584	0.571544	0.194744	2.49733	3.2951	2.64596	-0.579818	-0.527633	2.42657	1.90806	3.48278
OLP9	Fg	7	3.43011	2.39726	1.63491	4.265	0.930194	1.38479	-0.00400802	-0.778705	0.440189	0.464363	0.721249	0.419368	2.54937	2.68191	3.30908	-0.345311	-0.254892	2.37425	2.00915	3.49162
OKC4	Fg	8	3.63223	2.16401	1.33342	4.38965	1.30046	1.13815	-0.167236	-0.785262	0.0525925	0.143234	1.08924	0.909468	3.0148	2.55194	3.51041	-0.245901	-0.816445	2.80566	1.61641	3.69992
OKC5	Fg	9	3.58468	2.145	1.76951	4.3806	1.02173	1.37574	-0.0758017	-0.796288	0.367417	0.444045	0.880456	0.599935	2.89536	2.63361	3.46942	-0.432323	-0.711311	2.81756	1.58842	3.71108
NKC6	Fg	10	3.04118	1.70275	1.38429	3.83493	0.989541	1.16565	-0.331286	-0.689155	0.177309	0.253091	0.883354	0.561899	2.28473	1.97699	2.84839	-0.740239	-0.794073	2.12142	1.09961	3.09806
NKC7	Fg	11	3.60376	1.84356	1.49155	4.35664	1.20387	1.07739	-0.0758017	-0.476424	0.166362	0.256191	1.06815	0.75283	2.99743	2.47519	3.4653	-0.378336	-0.599657	2.84042	1.33789	3.74427
NKC8	Fg	12	3.44061	1.79059	1.37927	4.19088	1.13815	0.951272	-0.438505	-1.09661	0.168054	0.179818	0.884181	0.696143	2.68655	2.51858	3.30835	-0.640555	-0.994252	2.44755	1.18234	3.34346
NKC9	Fg	13	3.74052	2.0334	1.56945	4.4797	1.18876	1.10094	-0.368169	-1.05843	0.273076	0.420025	0.988797	0.721735	3.08251	2.78809	3.63353	-0.31061	-0.87707	2.95215	1.1259	3.76292
NKC10	Fg	14	3.43946	1.66013	1.20237	4.19025	1.00063	0.903003	-0.663588	-1.17766	-0.0758017	0.0353671	0.651283	0.20945	2.47696	2.76222	3.33566	-0.941609	-1.08767	2.34651	0.902597	3.23479
NKC11	Fg	15	3.22031	1.67952	1.46718	3.99111	1.11186	0.865418	-0.371064	-0.687165	0.102557	0.0314987	0.703592	0.24373	2.33534	2.44919	3.08836	-0.855666	-1.2694	2.21528	0.905432	3.10329
NKC15	Fg	16	3.15823	1.57567	1.26667	3.92642	0.931376	1.07124	-0.394525	-0.81871	0.119559	0.0516432	0.797507	0.548699	2.5587	1.96431	3.00529	-0.597837	-0.841647	2.33786	1.0032	3.15704
NKC20	Fg	17	3.61666	1.93138	1.49515	4.37233	1.01269	1.23431	-0.164875	-0.406466	0.281412	0.332894	0.936093	0.560187	2.92536	3.50796	2.66173	-0.58519	-0.581606	2.8231	1.17557	3.63643
OMH2	Fsp	1	2.64752	1.96206	1.49403	3.51753	0.582774	0.91549	-0.476424	-0.770028	-0.167236	-0.677274	0.562469	0.116894	2.04291	1.34937	2.45376	-0.90634	-1.00239	1.73254	1.49268	3.14536
OLP1	Fsp	2	2.39252	1.97838	1.5433	3.42706	0.389336	0.766398	-0.586987	-0.850971	-0.171975	-0.0273712	0.443403	0.18648	1.93109	0.274597	2.17031	-1.62964	-1.46102	1.92891	1.41658	3.4863
OLP7	Fsp	3	2.63806	2.16883	1.70092	3.6295	0.421994	0.91749	-0.699165	-1.25878	-0.0242927	-0.0439519	0.0629748	-0.567396	1.98389	1.48501	2.48382	-0.774357	-1.54178	1.78758	1.60603	2.97441
OMH14	Fsp	4	3.14299	2.54937	1.91368	4.0522	0.760338	1.20836	-0.41855	-0.576253	0.105261	-0.0790432	0.82198	0.493476	2.49552	2.09088	2.99573	-0.675307	-0.787458	2.40071	2.09777	3.46957
OTA6	Fsp	5	2.87852	2.41368	1.50408	3.83611	0.528862	1.0654	-0.36097	-0.820981	-0.349557	-0.363843	0.470004	0.256191	2.42179	1.30427	2.73826	-0.978166	-1.26231	2.27233	1.96557	3.35327
New-03	Fsp	6	2.48649	1.78002	1.34156	3.3754	0.210261	0.601032	-0.663588	-0.970219	-0.376878	-0.546453	0.266203	-0.471605	1.96319	1.09661	2.30548	-0.936493	-1.24133	1.85223	1.31775	2.87768
New-04	Fsp	7	2.5954	1.96487	1.57028	3.51005	0.327143	0.588897	-0.652005	-1.02722	-0.253603	-0.191161	0.324978	-0.147341	1.99198	1.34234	2.41207	-0.967584	-1.4065	1.98155	1.43604	2.99893
New-05	Fsp	8	2.58874	1.99252	1.18081	3.51071	0.57098	0.722706	-0.525939	-0.853316	-0.114289	-0.309246	0.394741	0.0295588	1.97962	1.26441	2.40776	-0.81871	-1.47841	1.94205	1.51094	3.5015
New-07	Fsp	9	2.43572	2.05297	1.64558	3.40426	0.261595	0.671924	-0.514165	-0.87707	-0.220647	-0.254892	0.27079	-0.225647	1.79758	1.28537	2.24209	-0.590591	-1.37833	1.78842	1.54351	2.92997
New-08	Fsp	10	2.76178	2.38223	2.04563	3.76269	0.427227	0.93177	-0.463624	-0.988861	-0.12443	-0.274437	0.329304	-0.0576291	2.11517	1.64616	2.6035	-0.911303	-1.46102	2.05553	1.9334	3.18532
FH1	Fh	1	3.42716	2.41448	1.72134	4.24172	1.31292	1.51447	-0.0460439	-0.275754	0.537662	0.456792	1.13172	0.775188	3.25382	2.11986	3.25123	-0.117658	-0.581606	2.74554	1.88388	3.7016
FH2	Fh	2	3.29824	2.32052	1.70965	4.12256	1.17031	1.45325	-0.28369	-0.505838	0.405465	0.409457	1.01921	0.702107	2.71602	1.98224	3.12285	-0.558616	-0.721547	2.57513	1.84924	3.55515
FH3	Fh	3	3.17065	2.27171	1.42455	4.00042	1.37042	1.29088	-0.240798	-0.420071	0.469378	0.500169	1.04451	1.04977	2.60484	1.75786	2.96093	-0.548181	-0.588787	2.42913	1.729	3.42035
FH4	Fh	4	3.35011	2.46283	1.66279	4.17192	0.975314	1.23837	-0.599657	-1.09362	-0.0888312	0.0685928	0.953201	0.715887	2.88631	1.93007	3.21278	-0.271809	-1.09362	2.70605	2.0234	3.61329
FH5	Fh	5	3.50442	2.55505	1.55857	4.31439	1.18234	1.44409	-0.0812101	-0.294371	0.489806	0.421994	1.02029	0.668342	3.0774	1.95897	3.36754	-0.449417	-0.505838	2.97965	1.95897	3.82871
FH6	Fh	6	3.24224	2.1045	1.58801	4.0377	1.09561	1.47064	0.135405	-0.298406	0.543486	0.525911	1.17403	0.835081	2.58671	2.03287	3.04979	-0.235722	-0.681219	2.44035	1.5554	3.42969
FH7	Fh	7	3.22938	2.33437	1.62904	4.0479	1.28204	1.40585	-0.619897	-1.05555	0.277632	0.335043	0.957816	0.625404	2.54616	2.12274	3.05069	-0.400478	-0.778705	2.37286	1.82519	3.45909
FH8	Fh	8	3.42325	2.16894	1.68658	4.21183	1.29774	1.41852	-0.328504	-0.586987	0.37638	0.371564	1.01305	0.699129	2.75436	2.37834	3.27143	-0.499226	-0.644357	2.62452	1.64673	3.57355
FH9	Fh	9	3.3548	2.21866	1.58801	4.14394	1.26243	1.44173	-0.189951	-1.06711	0.486123	0.443403	1.24271	1.14295	2.80862	1.90181	3.14381	-0.353822	-0.723606	2.50209	1.87916	3.57739
