# Supplementary material for: Fasciola gigantica, F. hepatica and Fasciola intermediate forms: geometric morphometrics and an artificial neural network to help morphological identification
Source: PubMed Central journal article supplement (PMC7034386; doi:10.7717/peerj.8597), 2020-02-18

*F. gigantica* - Cattle - Departures of observed means from the total mean computed over various studies, including ours

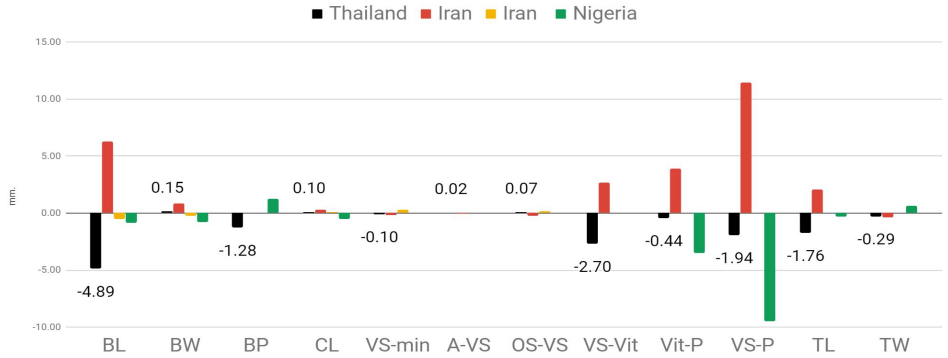

*F. hepatica* - Sheep - Departures of observed means from the average mean computed over various studies, including ours (black).

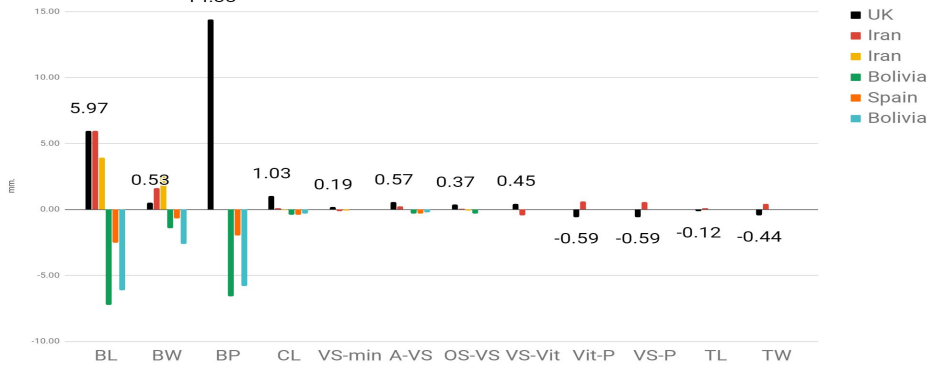

*F. intermediate form* - Departures of observed means from the average mean computed over various studies, including ours (black).

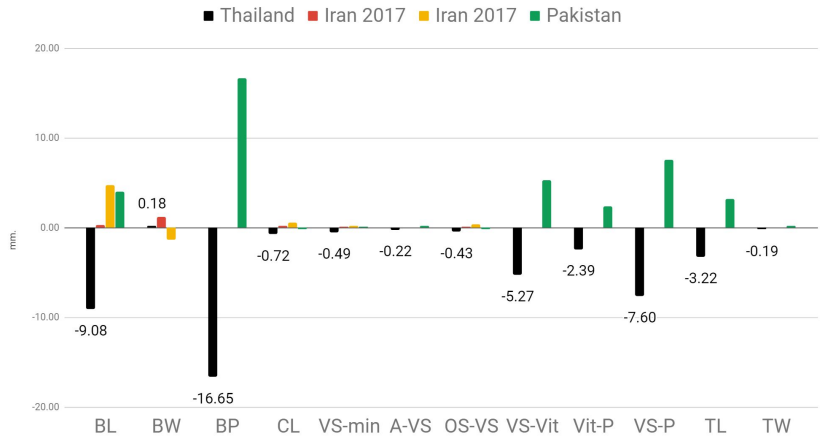

Supplement: peerj-08-8597-s001.pdf [file peerj-08-8597-s001.pdf]
